# Supplementary material
Source: PubMed Central journal article supplement (PMC6659150)
Supplement: jamaoncol-5-1481-s001.pdf [file jamaoncol-5-1481-s001.pdf]

## Supplementary Online Content

Kazandjian D, Gong Y, Keegan P, Pazdur R, Blumenthal GM. Prognostic value of the lung immune prognostic index for patients treated for metastatic non–small cell lung cancer. *JAMA Oncol*. Published online July 25, 2019. doi:10.1001/jamaoncol.2019.1747

**eTable 1.** Summary of Selected Clinical Studies

**eTable 2.** Summary of Key Demographics and Disease Characteristics of Pooled Cohorts

**eFigure 1.** Flow Chart of Clinical Studies and Patients Selected for Analysis

**eFigure 2.** Progression-Free Survival Based on LIPI Score and Treatment: ICI Studies

**eFigure 3.** Progression-Free Survival Based on LIPI Score and Treatment: TT Studies

**eFigure 4.** Kaplan Meier Progression-Free Survival Estimates by Treatment Arm for Each of the LIPI Categories

**eFigure 5.** Kaplan Meier Overall Survival Estimates by Treatment Arm for Each of the LIPI Categories

This supplementary material has been provided by the authors to give readers additional information about their work.

**eTable 1.** Summary of Selected Clinical Studies

| Study                | EXPERIMENTAL DRUG | CONTROL              | # OF PATIENTS | PATIENT POPULATION        |
|----------------------|-------------------|----------------------|---------------|---------------------------|
| <b>LUX-Lung 3</b>    | afatinib          | platinum doublet     | 345           | 1L EGFRm                  |
| <b>Oak</b>           | atezolizumab      | docetaxel            | 850           | 2L                        |
| <b>Poplar</b>        | atezolizumab      | docetaxel            | 287           | 2L                        |
| <b>ALTa</b>          | brigatinib        | brigatinib           | 222           | 2L ALK+                   |
| <b>Profile 1007</b>  | crizotinib        | pemetrexed/docetaxel | 347           | 2L ALK+                   |
| <b>Profile 1014</b>  | crizotinib        | platinum doublet     | 343           | 1L ALK+                   |
| <b>checkmate 017</b> | nivolumab         | docetaxel            | 272           | 2L squamous histology     |
| <b>checkmate 057</b> | nivolumab         | docetaxel            | 582           | 2L non-squamous histology |
| <b>aura3</b>         | osimertinib       | platinum doublet     | 419           | 2L T790M EGFRm            |
| <b>flaura</b>        | osimertinib*      | gefitinib/erlotinib  | 556           | 1L EGFRm                  |
| <b>Keynote 010</b>   | pembrolizumab     | docetaxel            | 691           | 2L PD-L1+                 |

\*For the FLAURA study, both experimental and control arms were pooled in the targeted therapy arm for the purpose of the pooled analysis.

Abbreviations: 1L: first-line treatment; EGFRm: patients with metastatic non-small cell lung cancer (NSCLC) whose tumors have activating epidermal growth factor receptor (EGFR) mutations; 2L: second-line treatment; ALK+: patients with NSCLC whose tumors are anaplastic lymphoma kinase (ALK) positive; T790M EGFRm: patients with metastatic EGFR T790M mutation-positive NSCLC; PD-L1+: patients with metastatic NSCLC whose tumors express PD-L1 (TPS  $\geq$ 1%).

**eTable 2.** Summary of Key Demographics and Disease Characteristics of Pooled Cohorts

| Variable     | ICI Studies    |               | TT Studies     |             |
|--------------|----------------|---------------|----------------|-------------|
|              | ICI (n=1,368)  | CCT (n=1,072) | TT (n=1,110)   | CCT (n=437) |
| Age ≥ 65     | 561 (41%)      | 475 (44%)     | 341 (31%)      | 102 (23%)   |
| Male         | 834 (61%)      | 657 (61%)     | 430 (39%)      | 164 (38%)   |
| Smoker       | 1,036 (76%)    | 773 (72%)     | 407 (37%)      | 136 (31%)   |
| Squamous     | 363 (27%)      | 294 (27%)     | Not applicable |             |
| ECOG 0       | 425 (31%)      | 351 (33%)     | 518 (47%)      | 248 (57%)   |
| ECOG 1       | 940 (69%)      | 719 (67%)     | 562 (51%)      | 178 (41%)   |
| ECOG ≥2      | 3 (0%)         | 1 (0%)        | 29 (3%)        | 11 (3%)     |
| ECOG unknown | 0 (0%)         | 1 (0%)        | 1 (0%)         | 0 (0%)      |
| EGFRm        | Not applicable |               | 587 (53%)      | 140 (32%)   |
| ALK+         |                |               | 523 (47%)      | 297 (68%)   |

Abbreviations: ICI: Immune checkpoint inhibitor; TT: targeted therapy; CCT: cytotoxic chemotherapy; ECOG PS: Eastern Cooperative Oncology Group performance status; EGFRm: patients with metastatic non-small cell lung cancer (NSCLC) whose tumors have activating epidermal growth factor receptor (EGFR) mutations; ALK+: patients with NSCLC whose tumors are anaplastic lymphoma kinase (ALK) positive.

**eFigure 1.** Flow Chart of Clinical Studies and Patients Selected for Analysis

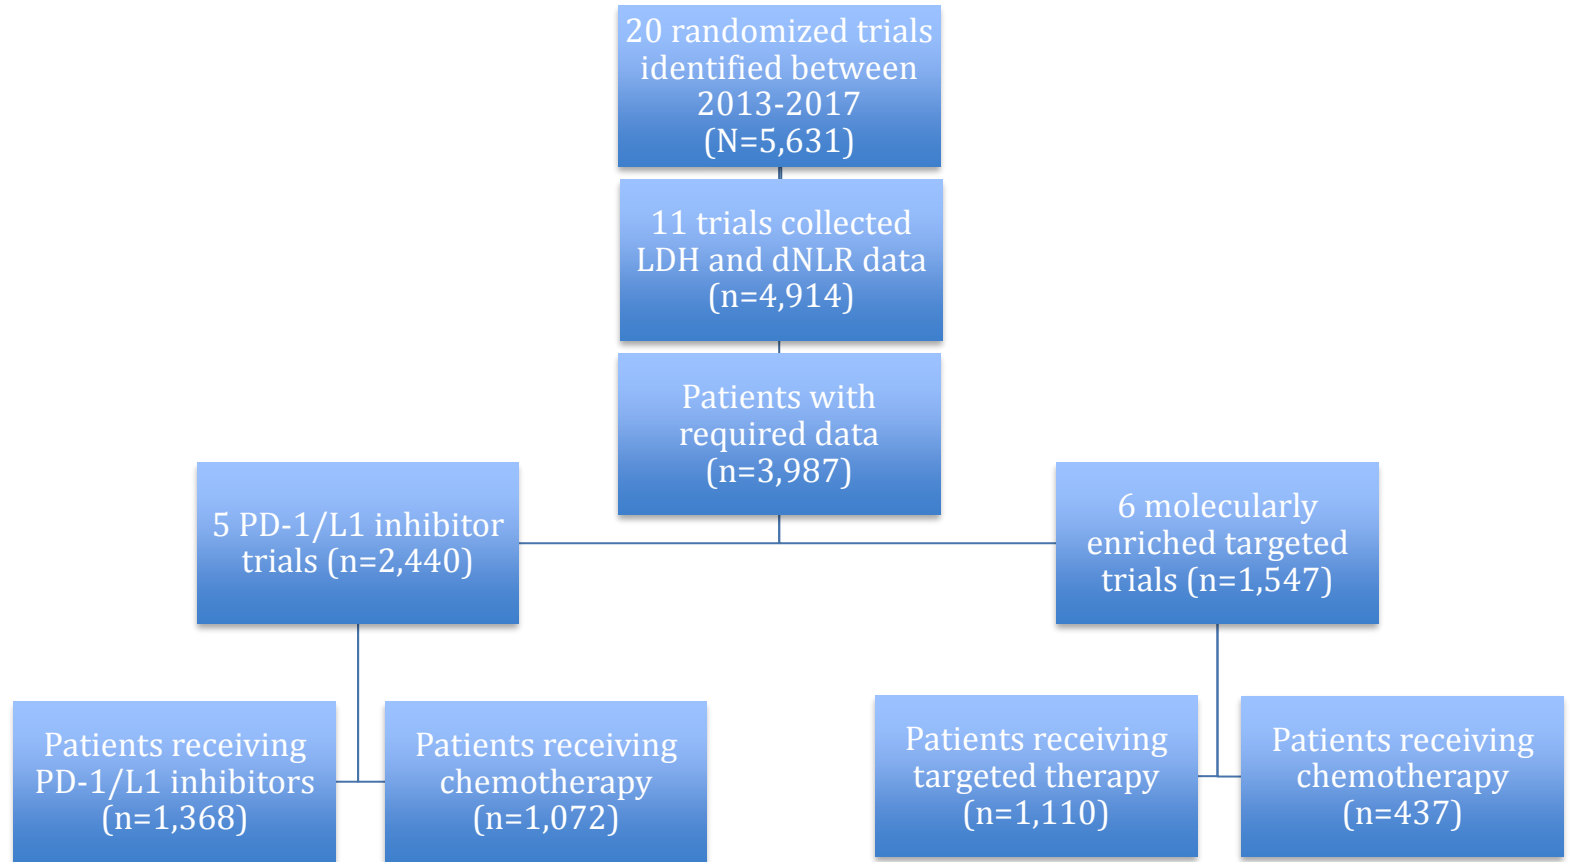

**eFigure 2.** Progression-Free Survival Based on LIPI Score and Treatment: ICI Studies

Abbreviations: LIPI, lung immune prognostic index; ICI, immune checkpoint inhibitor; CCT, cytotoxic chemotherapy; HR, hazard ratio; PFS, progression-free survival.

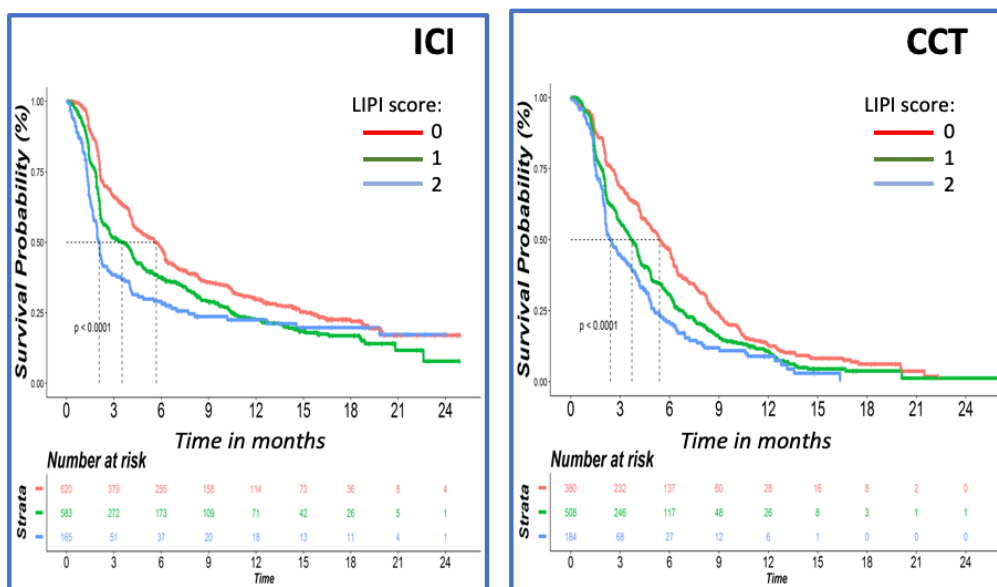

|                 |                       | ICI               |                   |                | CCT               |                   |                |
|-----------------|-----------------------|-------------------|-------------------|----------------|-------------------|-------------------|----------------|
|                 | LIPI                  | 0                 | 1                 | 2              | 0                 | 1                 | 2              |
|                 | (n)                   | 620               | 583               | 165            | 380               | 508               | 184            |
| PFS             | HR (95%CI)            | 0.59 (0.48, 0.72) | 0.79 (0.64, 0.98) | 1              | 0.56 (0.45, 0.68) | 0.78 (0.64, 0.95) | 1              |
|                 | Median months (95%CI) | 5.7 (4.6, 6.2)    | 3.5 (2.7, 4.2)    | 2.1 (1.7, 2.3) | 5.4 (4.7, 6.1)    | 3.7 (3.2, 4.1)    | 2.4 (2.1, 3.4) |
| Global Log Rank |                       | P <0.0001         |                   |                | P <0.0001         |                   |                |

**eFigure 3.** Progression-Free Survival Based on LIPI Score and Treatment: TT Studies

Abbreviations: LIPI, lung immune prognostic index; TT, targeted therapy; CCT, cytotoxic chemotherapy; HR, hazard ratio; PFS, progression-free survival.

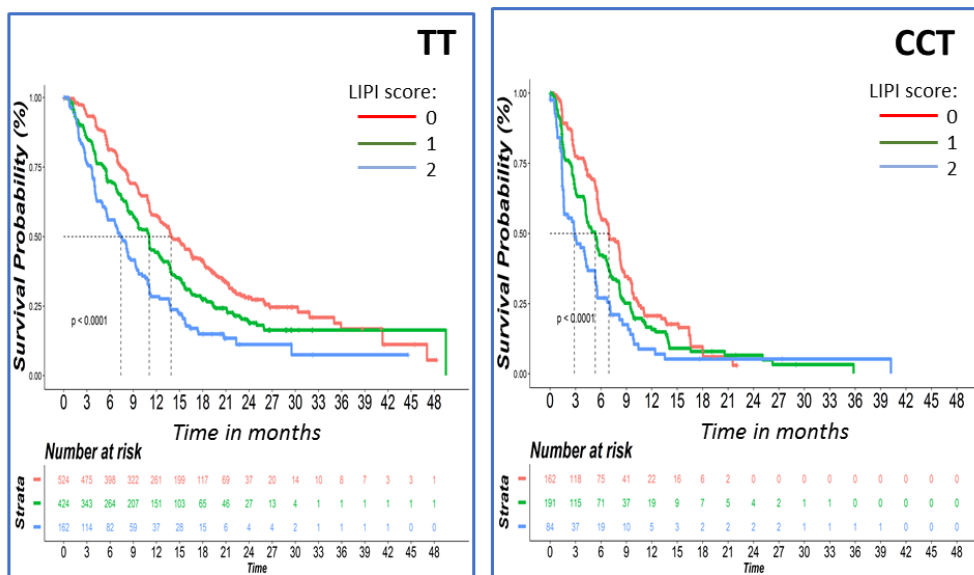

|     |                       | TT                |                   |                | CCT               |                   |                |
|-----|-----------------------|-------------------|-------------------|----------------|-------------------|-------------------|----------------|
|     | LIPI                  | 0                 | 1                 | 2              | 0                 | 1                 | 2              |
|     | (n)                   | 524               | 424               | 162            | 162               | 191               | 84             |
| PFS | HR (95%CI)            | 0.46 (0.37, 0.57) | 0.67 (0.54, 0.83) | 1              | 0.51 (0.38, 0.69) | 0.70 (0.53, 0.93) | 1              |
|     | Median months (95%CI) | 13.9 (12.9, 15.7) | 11.1 (9.6, 11.8)  | 7.4 (5.5, 8.6) | 6.9 (5.8, 8.2)    | 5.3 (4.2, 5.8)    | 2.9 (1.6, 4.3) |
|     | Global Log Rank       | P < 0.0001        |                   |                | P < 0.0001        |                   |                |

**eFigure 4.** Kaplan Meier Progression-Free Survival Estimates by Treatment Arm for Each of the LIPI Categories

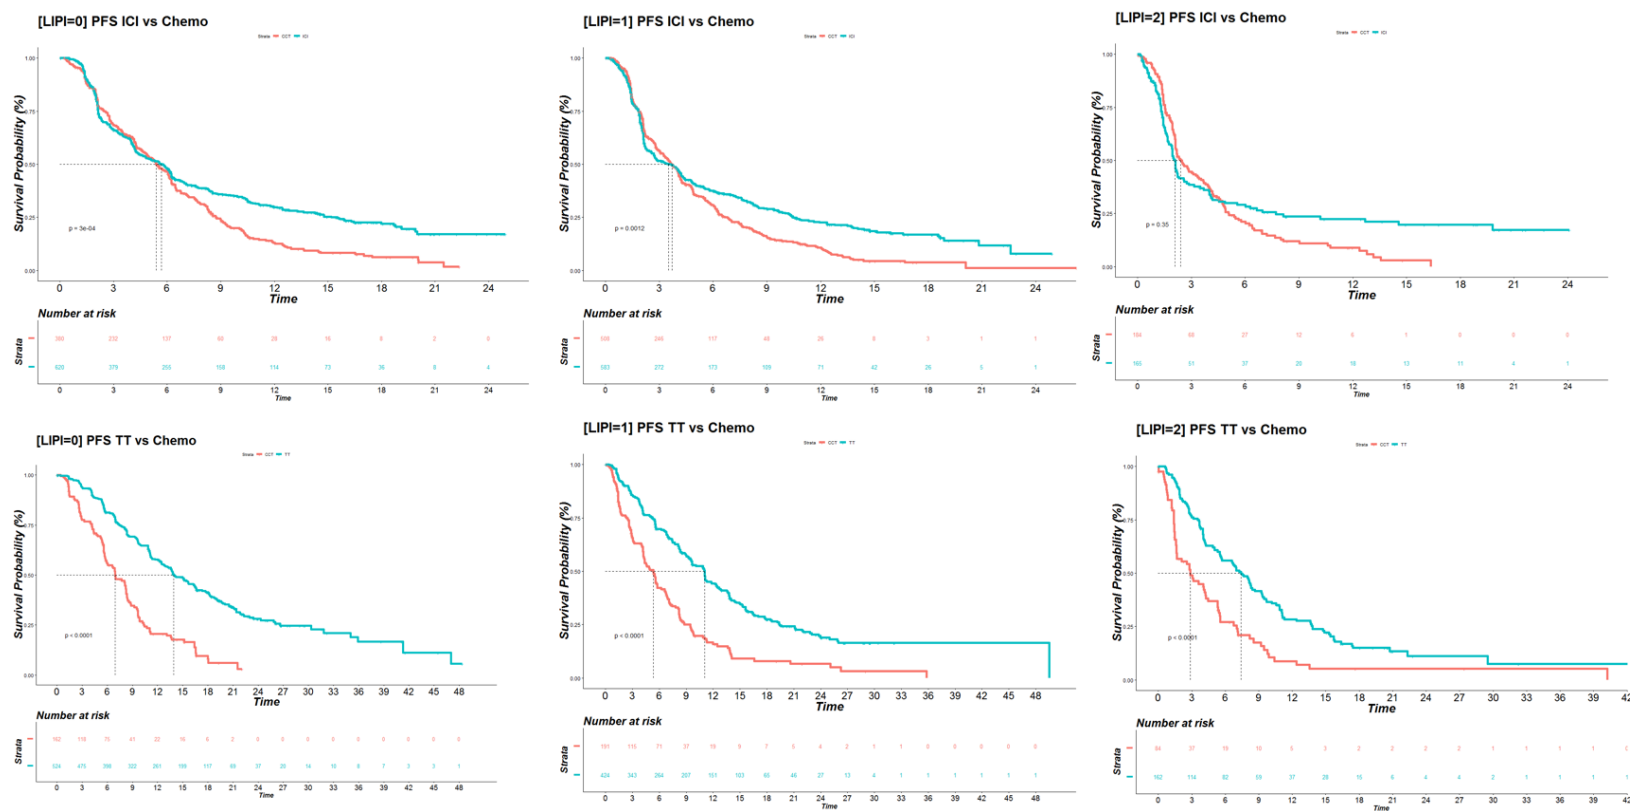

Abbreviations: LIPI, lung immune prognostic index; PFS, progression-free survival; ICI, immune checkpoint inhibitor; chemo, chemotherapy; TT, targeted therapy; Time, time in months.

**eFigure 5.** Kaplan Meier Overall Survival Estimates by Treatment Arm for Each of the LIPI Categories

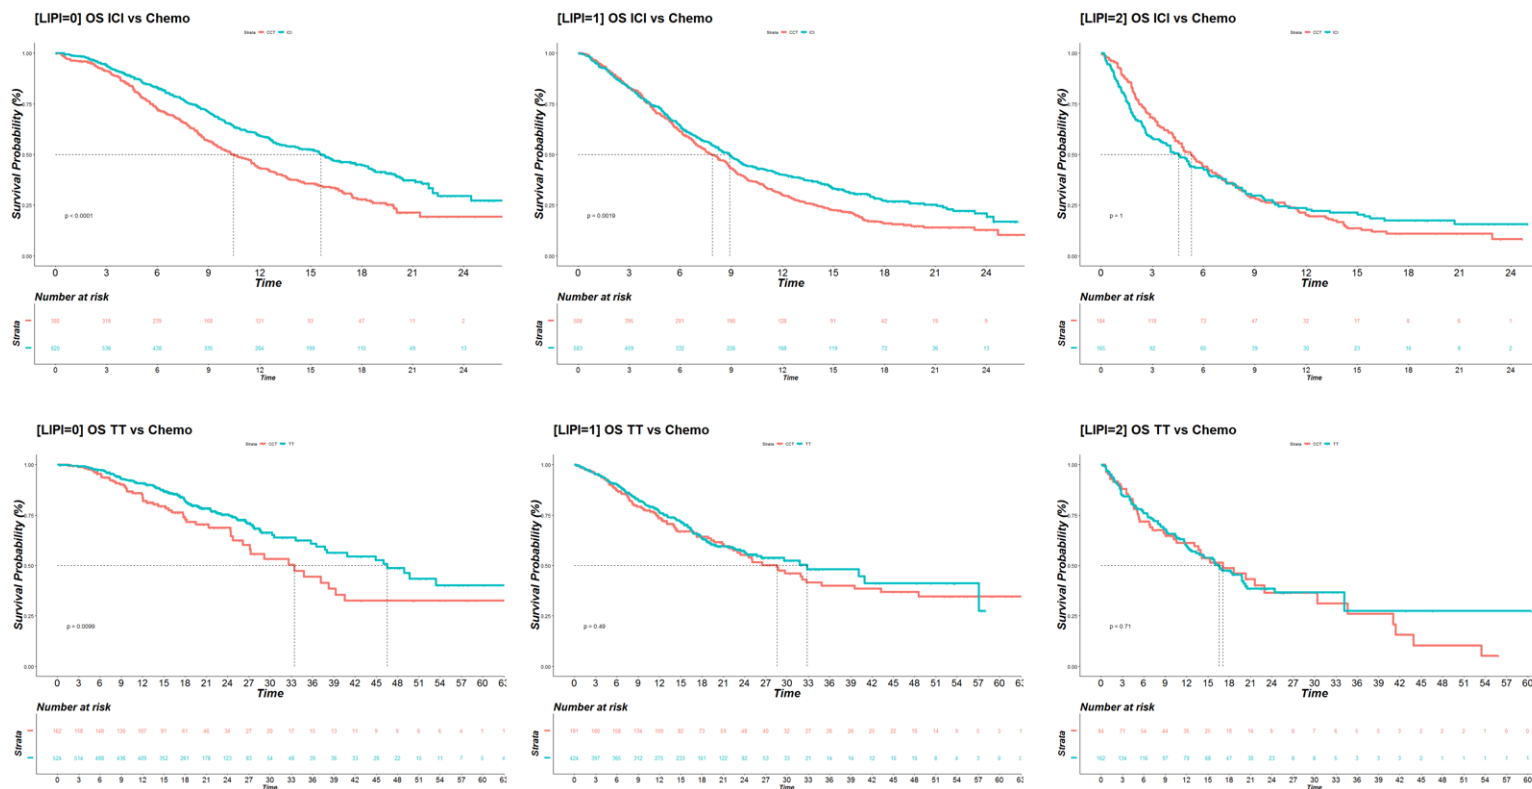

Abbreviations: LIPI, lung immune prognostic index; PFS, overall survival; ICI, immune checkpoint inhibitor; chemo, chemotherapy; TT, targeted therapy; Time, time in months.
